# Supplementary material for: Using Next-Generation Sequencing to Detect Differential Expression Genes in Bradysia odoriphaga after Exposure to Insecticides
Source: MDPI journal article supplement (doi:10.3390/ijms18112445), 2017-11-17
Supplement: s1 [file s1]

**Table S1.** The number of identified unigenes in *de novo* database and their proportion

| Sample name | Identified expressed unigenes | Proportion in <i>de novo</i> database (%) |
|-------------|-------------------------------|-------------------------------------------|
| CK1         | 29146                         | 85.34                                     |
| CK2         | 31163                         | 91.24                                     |
| CK3         | 30282                         | 88.66                                     |
| CH_6h1      | 31087                         | 91.02                                     |
| CH_6h2      | 30350                         | 88.86                                     |
| CH_6h3      | 30746                         | 90.02                                     |
| CH_48h1     | 30785                         | 90.14                                     |
| CH_48h2     | 30840                         | 90.30                                     |
| CH_48h3     | 31022                         | 90.83                                     |
| CL_6h1      | 31355                         | 91.80                                     |
| CL_6h2      | 30301                         | 88.72                                     |
| CL_6h3      | 31467                         | 92.13                                     |
| CL_48h1     | 30895                         | 90.46                                     |
| CL_48h2     | 31092                         | 91.03                                     |
| CL_48h3     | 30509                         | 89.33                                     |

CK: control; CH\_6: Chlorpyrifos treated 6 hours; CH\_48h: Chlorpyrifos treated 48 hours; CL\_6h: Clothianidin treated 6 hours; CL\_48h: Clothianidin treated 48 h.

**Table S2:** GO categories of DEUs.

|                                           | CH6h<br>VS CK | CH48h VS<br>CK | CL6h VS<br>CK | CL48h VS<br>CK |
|-------------------------------------------|---------------|----------------|---------------|----------------|
| Behavior                                  | 1             | 2              | 1             | 3              |
| Biological adhesion                       | 1             | 0              | 1             | 2              |
| Biological regulation                     | 12            | 17             | 17            | 31             |
| Cell component organization or biogenesis | 10            | 14             | 12            | 16             |
| Cellular process                          | 30            | 40             | 47            | 64             |
| Developmental process                     | 12            | 17             | 14            | 29             |
| Growth                                    | 1             | 1              | 1             | 8              |
| Immune system process                     | 1             | 4              | 3             | 6              |
| Localization                              | 11            | 10             | 14            | 18             |
| Locomotion                                | 6             | 6              | 7             | 11             |
| Metabolic process                         | 27            | 48             | 56            | 67             |
| Multicellular organismal process          | 10            | 15             | 13            | 27             |
| Multi-organismal process                  | 3             | 4              | 4             | 7              |
| Negative regulation of biological process | 4             | 6              | 5             | 8              |
| Positive regulation of biological process | 2             | 4              | 3             | 8              |
| Regulation of biological process          | 11            | 14             | 15            | 28             |
| Reproduction                              | 4             | 4              | 5             | 13             |
| Reproductive process                      | 4             | 4              | 5             | 7              |
| response to stimulus                      | 7             | 11             | 12            | 21             |
| signaling                                 | 2             | 4              | 6             | 21             |
| Single-organism process                   | 22            | 42             | 42            | 59             |
| Cell                                      | 22            | 27             | 25            | 46             |
| Cell junction                             | 3             | 3              | 2             | 3              |
| Cell part                                 | 22            | 27             | 25            | 46             |
| Extracellular Matrix                      | 1             | 0              | 1             | 1              |

|                                                    |     |     |     |     |
|----------------------------------------------------|-----|-----|-----|-----|
| Extracellular Matrix component                     | 1   | 0   | 1   | 1   |
| Extracellular region                               | 2   | 3   | 6   | 2   |
| Extracellular region part                          | 1   | 0   | 1   | 1   |
| Macromolecular complex                             | 9   | 8   | 9   | 19  |
| Membrane                                           | 6   | 8   | 17  | 19  |
| Membrane-enclosed lumen                            | 2   | 4   | 2   | 4   |
| Membrane part                                      | 4   | 5   | 12  | 12  |
| Organelle                                          | 19  | 21  | 19  | 36  |
| Organelle part                                     | 14  | 17  | 15  | 26  |
| Supramolecular fiber                               | 1   | 2   | 1   | 1   |
| Antioxidant activity                               | 1   | 3   | 1   | 3   |
| binding                                            | 36  | 44  | 64  | 78  |
| Catalytic activity                                 | 33  | 70  | 71  | 80  |
| Electron carrier activity                          | 0   | 1   | 2   | 2   |
| Molecular function regulator                       | 1   | 1   | 1   | 2   |
| Molecular transducer activity                      | 1   | 0   | 1   | 2   |
| Nucleic acid binding transcription factor activity | 1   | 1   | 1   | 2   |
| Signal transducer activity                         | 1   | 0   | 1   | 2   |
| Structural molecule activity                       | 6   | 6   | 6   | 13  |
| Transcription factor activity protein binding      | 0   | 1   | 0   | 2   |
| Transporter activity                               | 2   | 1   | 5   | 6   |
| total                                              | 370 | 520 | 572 | 863 |

Table S3. DEUs' percentage assigned into three main GO categories.

| Main Categories    | CH6h VS CK | CH48h VS CK | CL6h VS CK | CL48h VS CK | CL6h VS CH6h | CL48h VS CH48h | CH48h VS CH6h | CL48h VS CL6h |
|--------------------|------------|-------------|------------|-------------|--------------|----------------|---------------|---------------|
| biological process | 48.92      | 51.35       | 49.48      | 52.61       | 40.91        | 41.18          | 38.46         | 51.56         |
| cellular component | 28.92      | 24.04       | 23.78      | 25.14       | 22.73        | 32.77          | 24.48         | 24.00         |
| molecular function | 22.16      | 24.62       | 26.75      | 22.25       | 36.36        | 26.05          | 37.06         | 24.44         |

CK: Control; CH: Chlorpyrifos; CL: Clothianidin; 6h: treated 6 h; 48h: treated 48 h.

Table S4. KEGG pathway identification of DEUs

| Pathway Identification              | CH6h VS CK | CH48h VS CK | CL6h VS CK | CL48h VS CK |
|-------------------------------------|------------|-------------|------------|-------------|
| Cell growth and death               | 5          | 9           | 6          | 6           |
| Cell motility                       | 38         | 44          | 46         | 52          |
| Cellular community                  | 51         | 54          | 56         | 69          |
| Transport and catabolism            | 42         | 58          | 60         | 64          |
| Membrane transport                  | 1          | 0           | 1          | 1           |
| Signaling molecules and interaction | 27         | 47          | 43         | 47          |
| Signal transduction                 | 66         | 74          | 98         | 101         |
| Folding, sorting and degradation    | 18         | 25          | 35         | 32          |
| Replication and repair              | 1          | 2           | 3          | 3           |
| Transcription                       | 26         | 52          | 43         | 33          |

|                                            |     |      |      |      |
|--------------------------------------------|-----|------|------|------|
| Translation                                | 13  | 20   | 24   | 39   |
| Cancers: Overview                          | 63  | 71   | 100  | 100  |
| Cancers: Specific types                    | 32  | 37   | 49   | 46   |
| Cardiovascular diseases                    | 41  | 47   | 47   | 53   |
| Endocrine and metabolic diseases           | 12  | 19   | 24   | 21   |
| Immune diseases                            | 7   | 8    | 11   | 9    |
| Infectious diseases: Bacterial             | 65  | 82   | 87   | 93   |
| Infectious diseases: Parasitic             | 40  | 41   | 52   | 44   |
| Infectious diseases: Viral                 | 36  | 76   | 77   | 66   |
| Neurodegenerative diseases                 | 35  | 57   | 57   | 53   |
| Substance dependence                       | 3   | 6    | 7    | 6    |
| Amino acid metabolism                      | 13  | 35   | 29   | 31   |
| Biosynthesis of other secondary metabolism | 0   | 1    | 1    | 1    |
| Carbohydrate metabolism                    | 21  | 38   | 50   | 34   |
| Energy metabolism                          | 6   | 3    | 10   | 13   |
| Global and overview maps                   | 55  | 108  | 126  | 105  |
| Glycan biosynthesis and metabolism         | 1   | 4    | 3    | 2    |
| Lipid metabolism                           | 17  | 26   | 40   | 32   |
| Metabolism of cofactors and vitamins       | 8   | 9    | 17   | 23   |
| Metabolism of other amino acids            | 10  | 14   | 20   | 17   |
| Metabolism of terpenoids and polyketides   | 4   | 6    | 8    | 8    |
| Nucleotide metabolism                      | 19  | 41   | 39   | 25   |
| Xenobiotics biodegradation and metabolism  | 10  | 10   | 24   | 20   |
| Circulatory system                         | 23  | 25   | 29   | 32   |
| Development                                | 23  | 23   | 26   | 28   |
| Digestive system                           | 30  | 57   | 57   | 62   |
| Endocrine system                           | 54  | 74   | 95   | 87   |
| Environmental adaptation                   | 5   | 6    | 9    | 7    |
| Excretory system                           | 7   | 6    | 10   | 9    |
| Immune system                              | 46  | 62   | 64   | 68   |
| Nervous system                             | 11  | 23   | 30   | 28   |
| Sensory system                             | 2   | 9    | 10   | 6    |
| Total                                      | 987 | 1409 | 1623 | 1576 |

**Table S5.** RNA-Seq samples' value detected by Agilent 2100.

| Sample name                  | concentration (ng/ $\mu$ L) | volume ( $\mu$ L) | total amount ( $\mu$ g) | RNA Integrated Number |
|------------------------------|-----------------------------|-------------------|-------------------------|-----------------------|
| egg                          | 579                         | 60                | 34.7                    | 7.2                   |
| 2 <sup>nd</sup> instar larva | 714                         | 300               | 214.2                   | 7.2                   |
| 4 <sup>th</sup> instar larva | 1056                        | 200               | 211.2                   | 7.1                   |
| pupa                         | 1096                        | 80                | 87.7                    | 6.9                   |
| adult                        | 624                         | 120               | 74.9                    | 7.2                   |
| CK-1                         | 562                         | 60                | 33.72                   | 6.4                   |
| CK-2                         | 428                         | 80                | 34.24                   | 6.7                   |
| CK-3                         | 476                         | 60                | 28.56                   | 6.5                   |
| CH_6h-1                      | 832                         | 80                | 66.56                   | 6.9                   |
| CH_6h-2                      | 732                         | 80                | 58.56                   | 7.1                   |

|          |     |     |       |     |
|----------|-----|-----|-------|-----|
| CH_6h-3  | 525 | 160 | 84.00 | 7.0 |
| CH_48h-1 | 600 | 60  | 36.00 | 7.0 |
| CH_48h-2 | 573 | 80  | 45.84 | 7.0 |
| CH_48h-3 | 657 | 60  | 39.42 | 7.0 |
| CL_6h-1  | 450 | 160 | 72.00 | 7.0 |
| CL_6h-2  | 744 | 80  | 59.52 | 7.0 |
| CL_6h-3  | 603 | 160 | 96.48 | 7.0 |
| CL_48h-1 | 748 | 60  | 44.88 | 6.9 |
| CL_48h-2 | 708 | 60  | 42.48 | 6.9 |
| CL_48h-3 | 868 | 40  | 34.72 | 6.9 |

---

CK: Control; CH: Chlorpyrifos; CL: Clothianidin; 6h and 48h: treatment with Chlorpyrifos or Clothianidin after 6 or 48 h.

**Table S6.** The primers to confirm unigenes and RT-qPCR.

|                             | Gene name         | Unigene number | accession number in NCBI |                              | PCR product size (bp) |
|-----------------------------|-------------------|----------------|--------------------------|------------------------------|-----------------------|
| Primers to confirm unigenes | P450              | CL2656.Contig1 | KY997061                 | F: ATACTTCTTGGCGTTATTTCAAAT  | 1554                  |
|                             |                   | Unigene17178   | KY997062                 | R: CATGGGTCTCCTATTCAGTGATAC  | 2098                  |
|                             |                   |                |                          | F: TGGATTGCGTTCGAAACATT      |                       |
|                             |                   | Unigene 6476   | KY997063                 | R: AATTCACGTAATTCGGCACG      | 682                   |
|                             |                   |                |                          | F: TTCGCTCAAAGGTGTGTTACAA    |                       |
|                             | CL1542.Contig2    | CL1542.Contig2 | KY997064                 | R: ATATGACGTGTTGCAAAAGATGA   | 1450                  |
|                             |                   |                |                          | F: CTGCTGTAAAGTTGATCTGTTATC  |                       |
|                             |                   | CL276.Contig2  | KY997065                 | R: TCAGACGAGGTTAAGATGAGTGC   | 357                   |
|                             |                   |                |                          | F: CGGATTATCTGACCTCAAATACG   |                       |
|                             |                   |                |                          | R: GAAATGTGGCGAATCGCATA      |                       |
|                             | GST               | Unigene2860    | KY997066                 | F:                           | 898                   |
|                             |                   |                |                          | TTTGATTACTGTAAAAAGGAGAACC    |                       |
|                             |                   | Unigene16851   | KY997067                 | R: AATGTTATCCGACGTTAGTATTC   | 764                   |
|                             |                   |                |                          | F: CATTTTTTCCACACCATTGT      |                       |
|                             |                   | Unigene8896    | KY997068                 | R: TTGGTTTCTATCTATTGAACGTGAA | 846                   |
|                             |                   |                |                          | F: TGTAATGCAAAATCTACGCACAG   |                       |
| Primers for RT-qPCR         | Carboxylesterases | Unigene1880    | KY997069                 | R: TTAGTATTCGTAGCGGTCCGA     | 1899                  |
|                             |                   |                |                          | F:                           |                       |
|                             |                   | CL2626.Contig1 | KY997070                 | ACAGATACACGATCAGTTATCGTGA    | 1593                  |
|                             |                   |                |                          | R: TCGTTGCTACTAATCAGTTGAACC  |                       |
|                             |                   | Unigene12260   | MG407793                 | F: TTATGTGCTCTACGTTTCTGAAT   | 927                   |
|                             |                   |                |                          | R: CATACTAGCAGTTACGAGTTCG    |                       |
|                             | Cuticle protein   | Unigene1844    | MG407794                 | F:                           | 974                   |
|                             |                   |                |                          | TCTAAAAGATCAAGTTGAAGCTTTG    |                       |
|                             |                   | CL2724.Contig1 | MG407795                 | R: GCAAAATTGTAGTACATATCGACG  | 718                   |
|                             |                   |                |                          | F: GTTGCAAGGCACGCTTATAAT     |                       |
|                             |                   | Unigene15206   | MG407796                 | R: TCGATGAAATAGTCCAGCCG      | 693                   |
|                             |                   |                |                          | F:                           |                       |
|                             | GAPDH             | Unigene19803   | KY997073                 | TAAGGAAATAAAATCTTTTACGCA     | 1425                  |
|                             |                   |                |                          | R: TACAACTGTGAATATGCAATTGTTG |                       |
|                             |                   | Unigene19803   | KY997073                 | F: AAAATGGCATTCAAGTTTTTGAC   | 160                   |
|                             |                   |                |                          | R: GTTTTCAAACAGTTTGTTCAAAGAC |                       |
|                             |                   | Unigene19803   | KY997073                 | F: TTATCTTCTCAGAAATTTGCCCTT  | 106                   |
|                             |                   |                |                          | R: TATTCTATAACACGGTTTTAATGCC |                       |
| Primers for RT-qPCR         | P450              | CL2656.Contig1 | KY997061                 | F: ATATGGCTGTTCCCTTTTCC      | 146                   |
|                             |                   |                |                          | R: CAACTGTCCTATGATGCTGTTAGT  |                       |
|                             |                   | Unigene17178   | KY997062                 | F: TTGCTCCAGCTTTTCATCAG      | 126                   |
|                             |                   |                |                          | R: AACACTTTGCCACCTCTTT       |                       |
|                             |                   | Unigene 6476   | KY997063                 | F: TGTTGCTCAAAGGTGTGTT       | 131                   |
|                             |                   |                |                          | R: TTCGTGTGTTAAATTGGCAGG     |                       |
|                             | CL1542.Contig2    | CL1542.Contig2 | KY997064                 | F: AACAGACGGATGCAATCGA       | 196                   |
|                             |                   |                |                          | R: CAAGACAAGGCAAGGGAAG       |                       |
|                             |                   | CL276.Contig2  | KY997065                 | F: GTCATCATACCTGTCTACTCGCT   | 157                   |
|                             |                   |                |                          | R: GGAAGGAATACACTGCTGTCTTT   |                       |
|                             |                   | Unigene2860    | KY997066                 | F: TCATCCAGATAATCGGCAATA     | 197                   |
|                             |                   |                |                          | R: CATACTGCTCAGCGAACACAC     |                       |
|                             | GST               | Unigene16851   | KY997067                 | F: TACTCGGAGACTTCGGGTAGA     | 106                   |
|                             |                   |                |                          | R: AATTCGGAGGCAATAATCATG     |                       |
|                             |                   | Unigene8896    | KY997068                 | F: TTCATCCAGATAATCGGCAA      | 159                   |
|                             |                   |                |                          | R: CATACTGCTCAGCGAACACA      |                       |
|                             |                   | Unigene1880    | KY997069                 | F: ATTGAGACTGCTTCTCTTCTGC    | 130                   |
|                             |                   |                |                          | R: GGTGTTGTTTTTTATGTTCCG     |                       |
| Primers for RT-qPCR         | CL2626.Contig1    | CL2626.Contig1 | KY997070                 | F: GGTTACCAGACGTCCAGACAC     | 130                   |
|                             |                   |                |                          | R: GACCCACCTACGACAATCAAT     |                       |
|                             |                   | Unigene12260   | MG407793                 | F: GCTGGTGGTAGTAGTGTTCATTT   | 130                   |
|                             |                   |                |                          |                              |                       |
|                             |                   | Unigene12260   | MG407793                 |                              |                       |
|                             |                   |                |                          |                              |                       |
|                             | Carboxylesterases | Unigene12260   | MG407793                 |                              | 130                   |
|                             |                   |                |                          |                              |                       |
|                             |                   | Unigene12260   | MG407793                 |                              | 130                   |
|                             |                   |                |                          |                              |                       |
|                             |                   | Unigene12260   | MG407793                 |                              | 130                   |
|                             |                   |                |                          |                              |                       |

|                 |                |              |                                                                           |     |
|-----------------|----------------|--------------|---------------------------------------------------------------------------|-----|
|                 | Unigene1844    | MG40779<br>4 | R: GAGCTTTTCTCTTGGTTTTTG<br>F: CTTAAGTTCGTTTTGCGGTC                       | 124 |
| Cuticle protein | CL2724.Contig1 | MG40779<br>5 | R: TAGTCTCTTCCATGCTTTGGTT<br>F: GCCCTTGTTTCTTTTATTGCT                     | 200 |
|                 | Unigene15206   | MG40779<br>6 | R: GATCGGGTTTCCTGTTGATT<br>F: AAGACGGTTTGACGGGTG                          | 184 |
| GAPDH           | Unigene19803   | KY997073     | R: GCTGCTACGATTTTTCG<br>F: CGAAATCGTTGAAGGTCTGA<br>R: CTGGAATGATGTTTGCTGG | 122 |

F: forward; R: reverse; PCR: polymerase chain reaction; RT-qPCR: reverse transcription quantitative. Confirm unigenes PCR primer T<sub>m</sub> were set 58°C and RT-qPCR primer were set 56°C. GAPDH was considered as reference gene.

**Table S7.** The amplification efficiencies of primers for qRT-PCR

| <i>Gene name</i>         | <b>Unigene number</b> | <b>Curve fitting linear</b> | <b>R<sup>2</sup></b> | <b>amplification efficiencies</b> |
|--------------------------|-----------------------|-----------------------------|----------------------|-----------------------------------|
| <i>P450</i>              | CL2656.Contig1        | Y=3.33x+16.80               | 0.99                 | 1.99                              |
|                          | Unigene17178          | Y=3.25x+21.42               | 0.99                 | 2.05                              |
|                          | Unigene 6476          | Y=3.32x+17.95               | 0.99                 | 1.99                              |
|                          | CL1542.Contig2        | Y=3.40x+13.24               | 0.99                 | 1.96                              |
|                          | CL276.Contig2         | Y=3.46x+17.45               | 0.99                 | 1.95                              |
| <i>GST</i>               | Unigene2860           | Y=3.44x+14.40               | 0.99                 | 1.95                              |
|                          | Unigene16851          | Y=3.36x+15.48               | 0.99                 | 1.98                              |
|                          | Unigene8896           | Y=3.46x+14.37               | 0.99                 | 1.95                              |
|                          | Unigene1880           | Y=3.50x+16.52               | 0.99                 | 1.93                              |
|                          | CL2626.Contig1        | Y=3.50x+14.06               | 0.99                 | 1.93                              |
| <i>Carboxylesterases</i> | Unigene12260          | Y=3.59x+18.11               | 0.99                 | 1.90                              |
|                          | Unigene1844           | Y=3.35x+19.94               | 0.99                 | 1.99                              |
| <i>Cuticle protein</i>   | CL2724.Contig1        | Y=3.57x+18.54               | 0.99                 | 1.91                              |
|                          | Unigene15206          | Y=3.48x+17.35               | 0.99                 | 1.94                              |
| <i>GAPDH</i>             | Unigene19803          | Y=3.41x+12.03               | 0.99                 | 1.96                              |
